# Supplementary material
Source: PubMed Central journal article supplement (PMC6363854)
Supplement: NIHMS1511720-supplement-2.pdf [file NIHMS1511720-supplement-2.pdf]

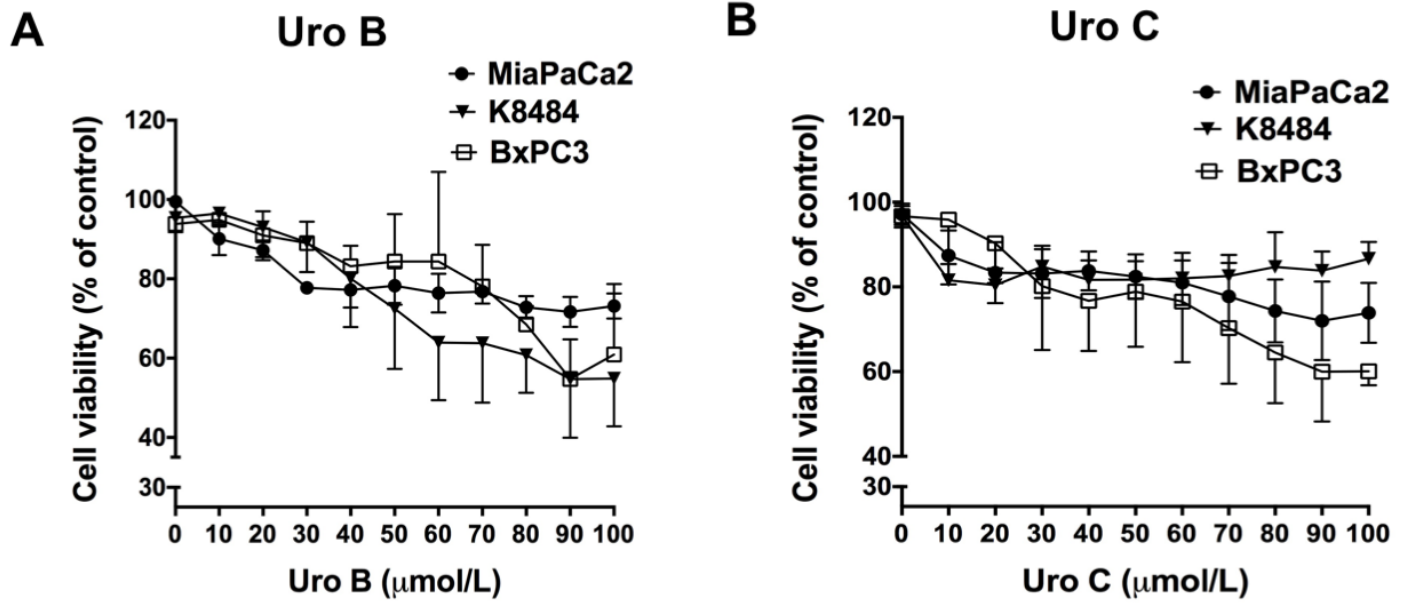

**Supplementary Figure S1.** Uro B and Uro C treatment didn't affect PDAC cell viability. Relative cell viability in MiaPaCa2, BxPC3 and K8484 cells upon treatment with Uro B (A) or Uro C (B) (0-100  $\mu\text{mol/L}$ ) for 48 hours was assessed using MTS viability assay.
