# Supplementary material
Source: PubMed Central journal article supplement (PMC6363854)
Supplement: NIHMS1511720-supplement-3.pdf [file NIHMS1511720-supplement-3.pdf]

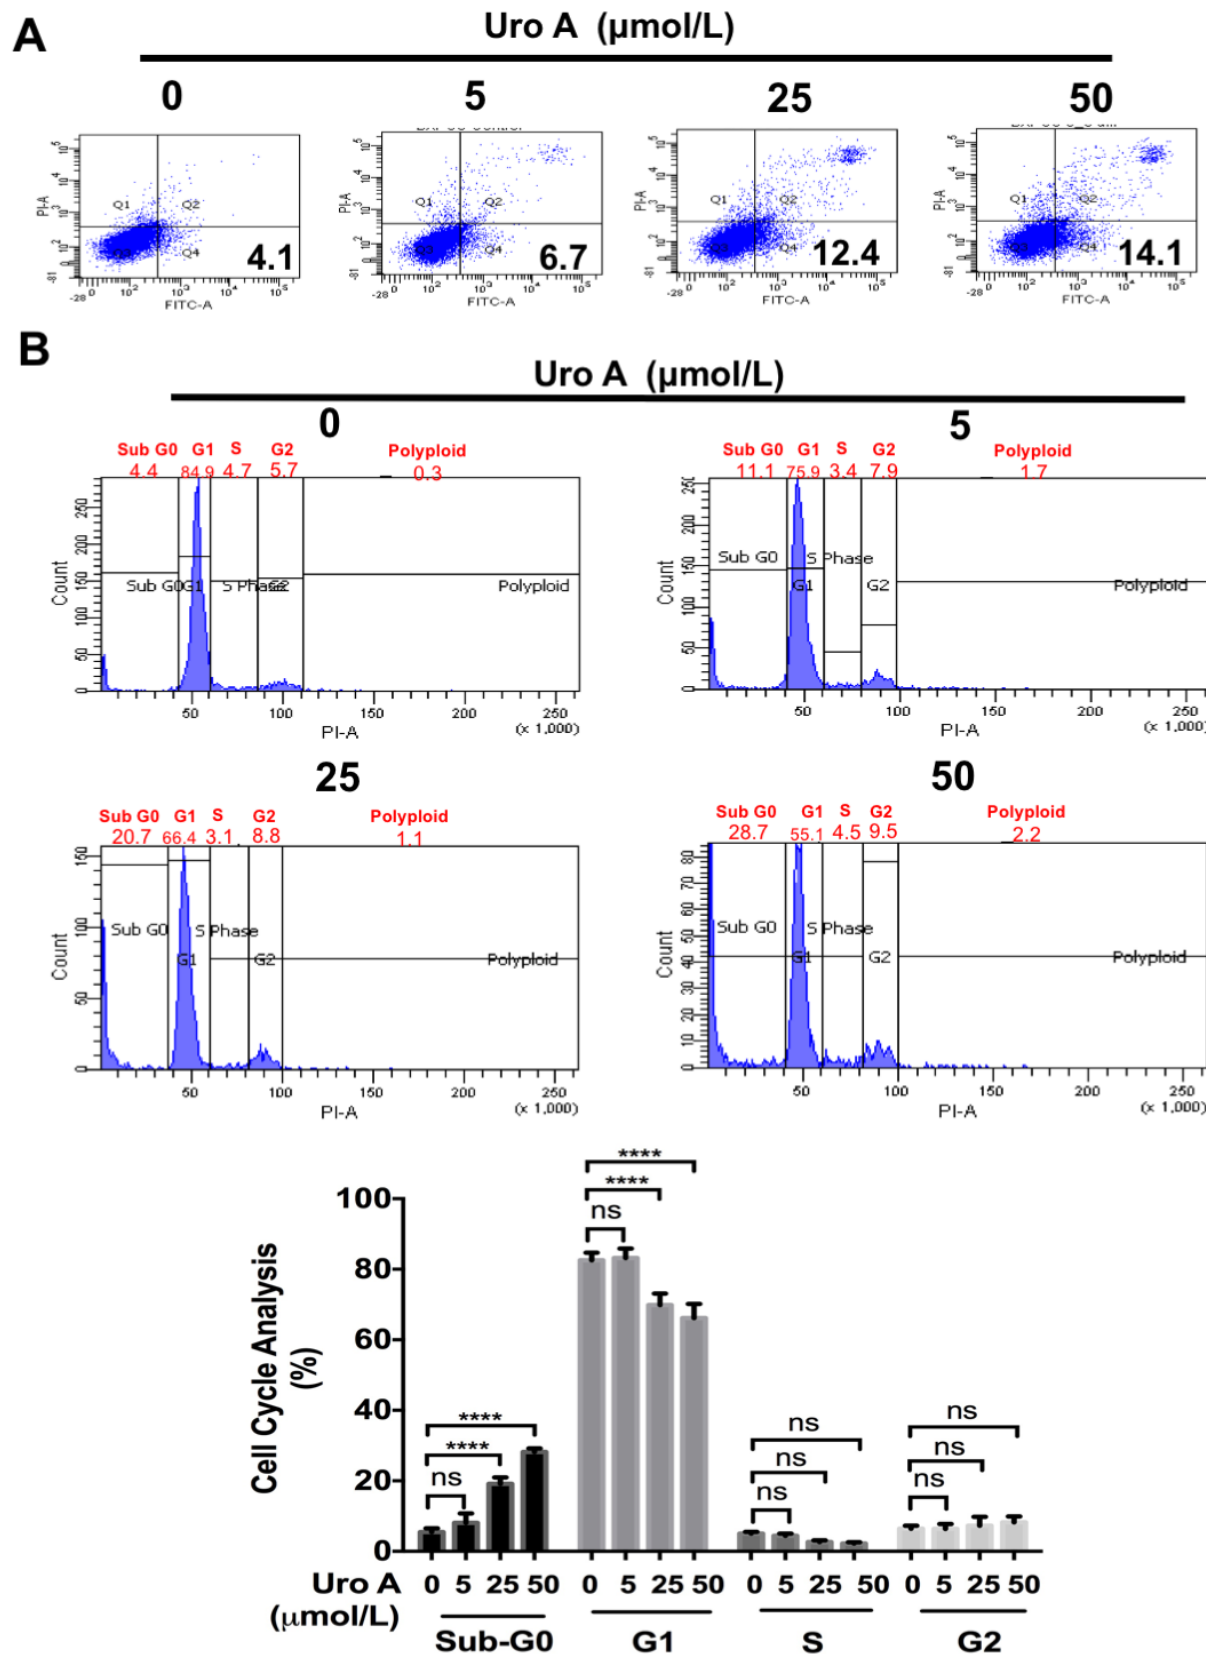

**Supplementary Figure S2.** Uro A treated PDAC cells analyzed for cell apoptosis and cell cycle. **A.** MiaPaCa2 cells were treated with UroA (0-50  $\mu\text{mol/L}$ ) for 24 hours and analyzed for early apoptosis (annexin positive and PI negative) using flow cytometry. **B.** Cell cycle analysis of MiaPaCa2 cells treated with Uro A (0-50  $\mu\text{mol/L}$ ) for 24 hours (*top panel*). Proportion of cells in Sub-G0, G1, S and G2 (PI positive) phase upon Uro A treatment (*lower panel*). Data represented as mean of triplicate samples (ns,  $P > 0.05$ ; \*\*\*,  $P < 0.001$ ).
