# Supplementary material
Source: PubMed Central journal article supplement (PMC6363854)
Supplement: NIHMS1511720-supplement-4.pdf [file NIHMS1511720-supplement-4.pdf]

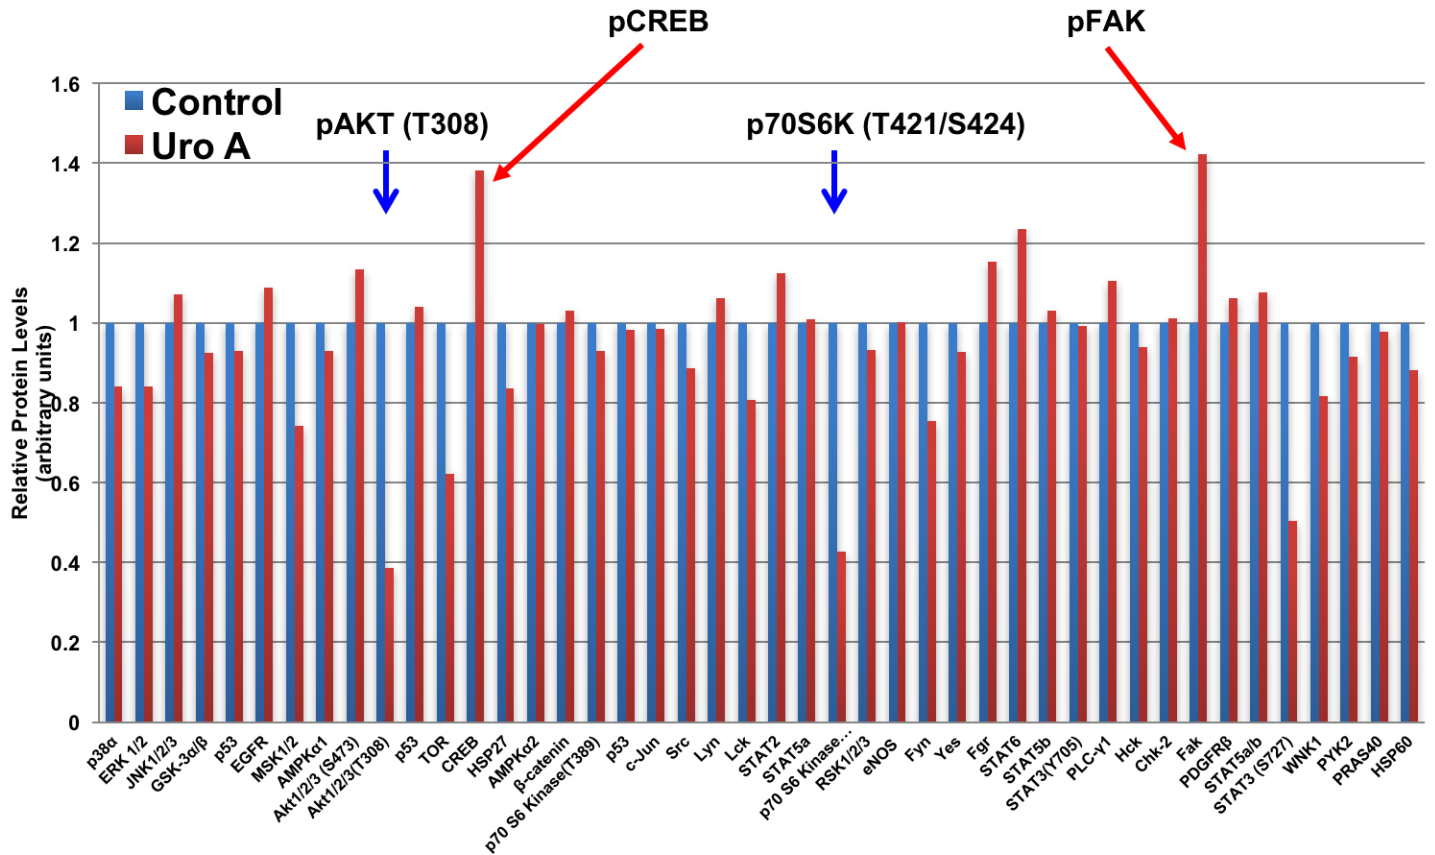

**Supplementary Figure S3.** MiaPaCa2 cells were treated with or without Uro A (25 μmol/L) for 3 hours, after which the cells were harvested and lysates were prepared using the buffer supplied (R&D systems). The lysates were incubated on a human phospho-kinase array and the remainder of the procedure was followed according to the manufacturer’s instructions. Uro A treatment decreased pAKT (T308) and p70S6K (T421/S424) levels, and increased pCREB and pFAK levels in MiaPaCa2 cells.
