# Supplementary material
Source: PubMed Central journal article supplement (PMC6363854)
Supplement: NIHMS1511720-supplement-5.pdf [file NIHMS1511720-supplement-5.pdf]

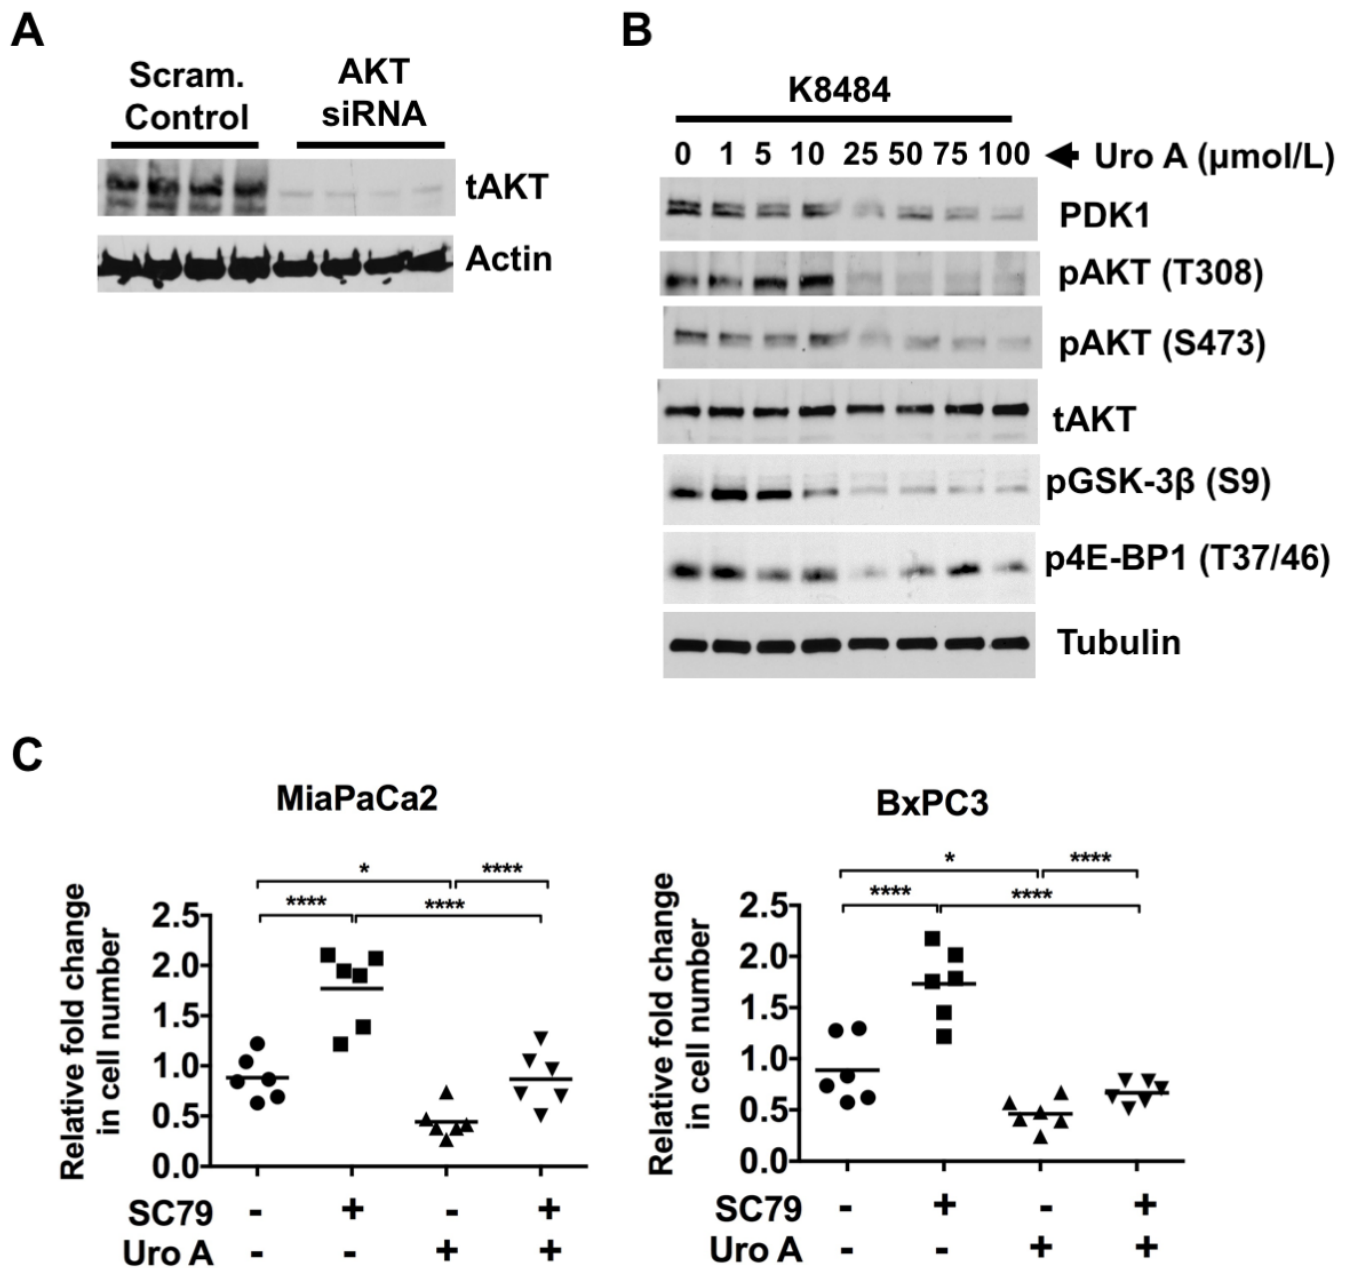

**Supplementary Figure S4.** AKT knockdown in BxPC3 cells. **A.** BxPC3 cells were silenced for AKT and analyzed for total AKT expression by immunoblot. **B.** K8484 cells were treated with or without Uro A (0-100 μmol/L) for 3 hours, after which the cells were harvested and lysates were prepared. The lysates were immunoblotted for pAKT (T308), pAKT (S473), PDK1, pGSK3β and p4E-BP1. **C.** AKT activator SC79 (10 μmol/L) exposure with Uro A (25 μmol/L) in MiaPaCa2 and BxPC3 cells shows a significant reduction in the cell proliferation when compared to SC79 exposed cells.
