# Supplementary material
Source: PubMed Central journal article supplement (PMC6363854)
Supplement: NIHMS1511720-supplement-6.pdf [file NIHMS1511720-supplement-6.pdf]

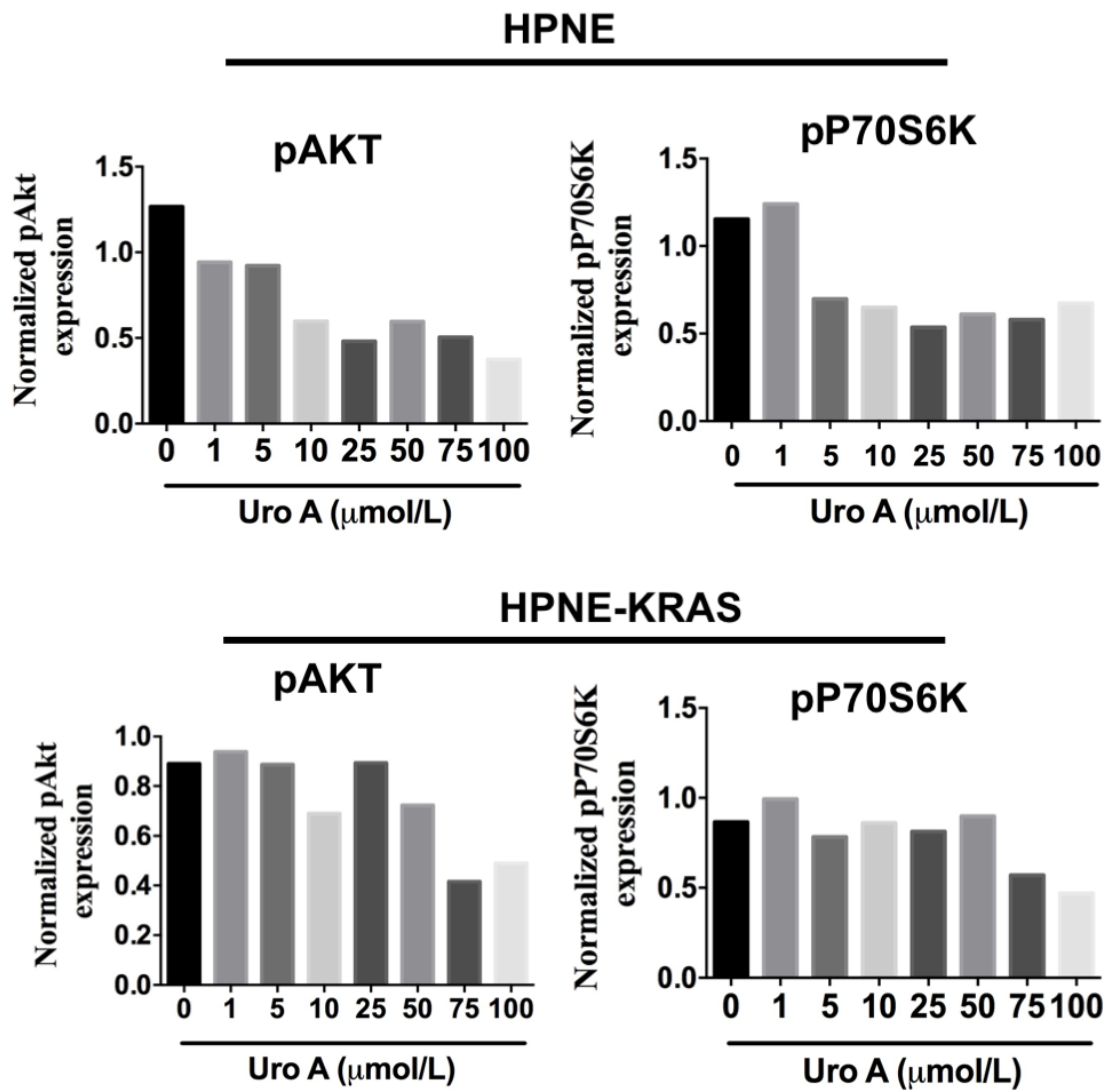

**Supplementary Figure S5.** Densitometry analyses of pAkt and pP70S6K. HPNE and HPNE-KRAS cells were treated with or without Uro A (0-100 μmol/L) for 3 hours and lysates were immunoblotted for pAkt and pP70S6K. The densitometry analyses of pAkt and pP70S6K were normalized to their respective total AKT and P70S6K protein were shown.
