# Supplementary material
Source: PubMed Central journal article supplement (PMC6363854)
Supplement: NIHMS1511720-supplement-7.pdf [file NIHMS1511720-supplement-7.pdf]

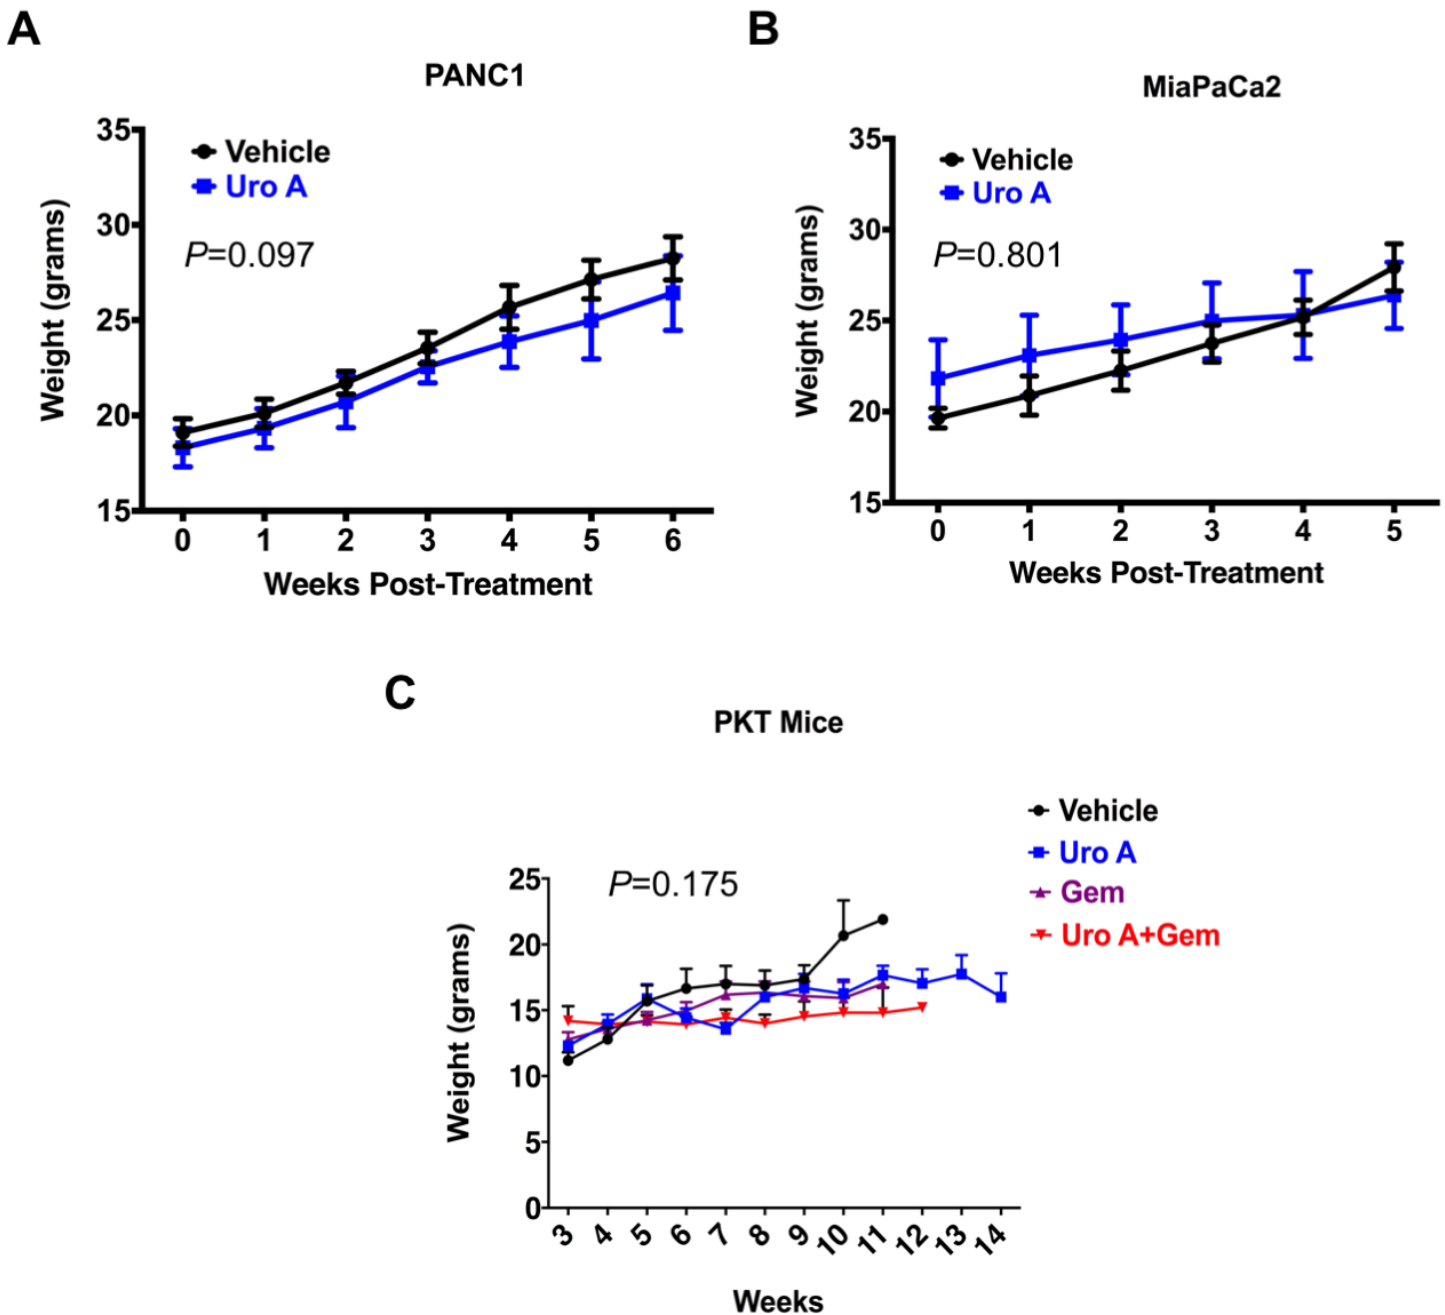

**Supplementary Figure S6.** Athymic nude mice and PKT mice body weight during Uro A treatment. Xenografts of PANC1 (A) and MiaPaCa2 (B) cells were injected in Fox1-nu/nu mice and treated with Uro A (20 mg/kg/day) or vehicle as indicated. Body weights were recorded weekly. C. PKT mice were treated with vehicle, Uro A (20 mg/kg/daily), gemcitabine (Gem; 20mg/kg/3 day) or Uro A+Gem as indicated and body weights were recorded weekly for up to 14 weeks. There were no significant changes in body weight.
